# Supplementary material for: Development and Validation of a Scoring System for Hemorrhage Risk in Brain Arteriovenous Malformations
Source: PubMed Central journal article supplement (PMC9978947; doi:10.1001/jamanetworkopen.2023.1070), 2023-03-01
Supplement: jamanetwopen-e231070-s001.pdf [file jamanetwopen-e231070-s001.pdf]

## Supplementary Online Content

Chen Y, Han H, Meng X, et al. Development and validation of a scoring system for hemorrhage risk in brain arteriovenous malformations. *JAMA Netw Open*. 2023;6(3):e231070. doi:10.1001/jamanetworkopen.2023.1070

**eMethods 1.** Protocol for Data Quality Management

**eMethods 2.** Calculation of Predicted Hemorrhage Probability According to VALE Score

**eTable 1.** Breakdown of Missing Data in the Derivation Cohort

**eTable 2.** Univariable Analysis of the Derivation Cohort

**eFigure 1.** Kaplan-Meier Curves of Overall and Subgroup Hemorrhage-Free Probability in the Conservative Treatment Validation Cohort

**eTable 3.** Literature Review of Factors Associated With Arteriovenous Malformation Rupture

**eTable 4.** Variable Selection and Bootstrap-Derived Quantities Useful for Assessing Stability

**eFigure 2.** Hemorrhage Probability in the Derivation Cohort

**eTable 5.** Subgroup Analysis of VALE Score in the Conservative Treatment Validation Cohort According to the Retrospective and Prospective Nature of the Survival Data

**eFigure 3.** Illustration Cases for the VALE Score

**eTable 6.** Univariable Analysis of Angiographic Features in Different Cohorts

### **eReferences**

This supplemental material has been provided by the authors to give readers additional information about their work.

## **eMethods 1.** Protocol for Data Quality Management

1. Definition of variables were discussed and unified according to the terminology reporting standards or published paper before the initiation of data collection. Clinical research coordinators (CRCs) and neurosurgery residents were then trained by a cerebrovascular neurosurgeon with more than 15 years' working experience. CRCs were responsible for demographic information and follow-up data, and neurosurgery residents for angiographic features. The two parts were blinded to each other to ensure the data collected were not biased by imaging characteristics or clinical outcomes.
2. A standard training dataset with 50 cases were used to check the consistency of data collectors. For those variables or cases with significant interobserver variation, the consensus was reached by either modifying the confusing definitions or retraining the data collectors. Only when the consistency reached 90% can the CRC or the resident allowed to extracting information independently.
3. While recording data, one could ask for help about unsure cases in a discussion group with cerebrovascular neurosurgeons in it, or mark these cases and discuss in weekly meetings.
4. The group leader with more than five years' working experience randomly spot checks these data biweekly. Investigators would receive training again if their data were of low quality, and these data would be recollected by other investigators.

**eMethods 2.** Calculation of Predicted Hemorrhage Probability According to VALE Score

eTable 1. Breakdown of Missing Data in the Derivation Cohort

The finally selected variables would be included in a logistic regression model with the binomial outcome of rupture presentation.

1. Final predictors with  $\beta$ -coefficients and the intercept would form a linear regression equation. In this study, the equation was as follows:

$$y = -0.090 + 1.185 (\text{Ventricular system involvement}) - 1.854 (\text{Venous aneurym}) \\ + 0.371 (\text{Deep location}) + 0.833 (\text{Exclusively deep drainage})$$

2. Plugging the results into the sigmoid function formula could generate a number between 0 to 1. The value represents the predicted hemorrhage probability of each individual.

$$\text{Predicted value} = \frac{e^y}{1 + e^y}$$

**eTable 1.** Breakdown of Missing Data in the Derivation Cohort

| Variable                           | Derivation Cohort, No. (%)<br>(n = 3585) |
|------------------------------------|------------------------------------------|
| Female                             | -                                        |
| Age at diagnosis, y, median (IQR)  | -                                        |
| Hemorrhagic presentation           | -                                        |
| Seizure                            | -                                        |
| Size (cm)                          | -                                        |
| Location                           | -                                        |
| Exclusively deep location          | -                                        |
| Ventricular system involvement     | -                                        |
| Eloquent region                    | -                                        |
| Feeding artery                     | -                                        |
| Single feeder                      | 94 (2.6)                                 |
| Dilation                           | 67 (1.9)                                 |
| Multiple source                    | 60 (1.7)                                 |
| Perforating artery                 | 66 (1.8)                                 |
| Diffuse nidus                      | 77 (2.1)                                 |
| Draining vein                      | -                                        |
| Stenosis                           | 58 (1.6)                                 |
| Any deep drainage                  | 57 (1.6)                                 |
| Exclusive deep drainage            | 57 (1.6)                                 |
| Venous aneurysm                    | 66 (1.8)                                 |
| Aneurysm                           | 75 (2.1)                                 |
| Spetzler-Martin grade              | 57 (1.6)                                 |
| Supplemented Spetzler-Martin grade | 90 (2.5)                                 |

Abbreviation: IQR, interquartile range.

**eTable 2.** Univariable Analysis of the Derivation Cohort

| Characteristic                    | No. (%)                    |                              | P      |
|-----------------------------------|----------------------------|------------------------------|--------|
|                                   | Ruptured AVM<br>(n = 2189) | Unruptured AVM<br>(n = 1396) |        |
| Female                            | 950 (43.4)                 | 535 (38.3)                   | 0.003  |
| Age at diagnosis, y, median (IQR) | 22.2 (13.0 – 32.9)         | 26.8 (17.0 – 37.5)           | <0.001 |
| Seizure                           | 270 (12.3)                 | 583 (41.8)                   | <0.001 |
| Size (cm)                         |                            |                              | <0.001 |
| <3                                | 1321 (60.3)                | 457 (32.7)                   |        |
| 3-6                               | 746 (34.1)                 | 710 (50.9)                   |        |
| >6                                | 122 (5.6)                  | 229 (16.4)                   |        |
| Location                          |                            |                              | <0.001 |
| Frontal                           | 456 (20.8)                 | 456 (32.7)                   | <0.001 |
| Temporal                          | 591 (27.0)                 | 390 (27.9)                   | 0.565  |
| Parietal                          | 521 (23.8)                 | 423 (30.3)                   | <0.001 |
| Occipital                         | 423 (19.3)                 | 310 (22.2)                   | 0.041  |
| Cerebellum                        | 249 (11.4)                 | 90 (6.4)                     | <0.001 |
| Brain stem                        | 81 (3.7)                   | 36 (2.6)                     | 0.081  |
| Basal ganglia                     | 313 (14.3)                 | 77 (5.5)                     | <0.001 |
| Thalamus                          | 166 (7.6)                  | 40 (3.0)                     | <0.001 |
| Intra-ventricle                   | 111 (5.1)                  | 43 (3.1)                     | 0.005  |
| Insula                            | 49 (2.2)                   | 23 (1.6)                     | 0.268  |
| Exclusively deep location         | 693 (31.7)                 | 200 (14.3)                   | <0.001 |
| Infratentorial location           | 301 (13.8)                 | 99 (7.1)                     | <0.001 |
| Ventricular system involvement    | 1477 (67.5)                | 468 (33.5)                   | <0.001 |
| Eloquent region                   | 1281 (58.5)                | 719 (51.5)                   | <0.001 |
| Feeding artery                    |                            |                              |        |
| Single feeder                     | 889 (40.6)                 | 225 (16.1)                   | <0.001 |
| Dilation                          | 755 (34.5)                 | 909 (65.1)                   | <0.001 |
| Multiple source                   | 468 (21.4)                 | 523 (37.5)                   | <0.001 |
| ACA supply                        | 555 (25.4)                 | 496 (36.8)                   | <0.001 |
| MCA supply                        | 1260 (59.2)                | 935 (69.4)                   | <0.001 |
| PCirA supply                      | 859 (39.2)                 | 523 (37.5)                   | 0.303  |
| Perforating artery                | 928 (42.4)                 | 419 (30.0)                   | <0.001 |
| Diffuse nidus                     | 995 (45.5)                 | 320 (22.9)                   | <0.001 |
| Draining vein                     |                            |                              |        |
| Stenosis                          | 413 (18.9)                 | 152 (10.9)                   | <0.001 |
| Deep drainage                     | 1009 (46.1)                | 415 (29.7)                   | <0.001 |
| Exclusive deep drainage           | 721 (32.9)                 | 137 (9.8)                    | <0.001 |
| Venous aneurysm                   | 141 (6.4)                  | 431 (30.9)                   | <0.001 |
| Aneurysm                          | 402 (18.4)                 | 197 (14.1)                   | 0.001  |

|                                    |            |            |        |
|------------------------------------|------------|------------|--------|
| Spetzler-Martin grade              |            |            | <0.001 |
| 1                                  | 371 (16.9) | 201 (14.4) |        |
| 2                                  | 751 (34.3) | 453 (32.4) |        |
| 3                                  | 721 (32.9) | 458 (32.8) |        |
| 4                                  | 297 (13.6) | 203 (14.5) |        |
| 5                                  | 49 (2.2)   | 81 (5.8)   |        |
| Supplemented Spetzler-Martin grade |            |            | <0.001 |
| 2                                  | 82 (3.7)   | 0 (0.0)    |        |
| 3                                  | 275 (12.6) | 44 (3.2)   |        |
| 4                                  | 562 (25.7) | 162 (11.6) |        |
| 5                                  | 631 (28.8) | 337 (24.1) |        |
| 6                                  | 435 (19.9) | 396 (28.4) |        |
| 7                                  | 175 (8.0)  | 297 (21.3) |        |
| 8                                  | 25 (1.1)   | 123 (8.8)  |        |
| 9                                  | 4 (0.2)    | 33 (2.4)   |        |
| 10                                 | 0 (0.0)    | 4 (0.3)    |        |

Abbreviation: IQR, interquartile range.

**eFigure 1.** Kaplan-Meier Curves of Overall and Subgroup Hemorrhage-Free Probability in the Conservative Treatment Validation Cohort

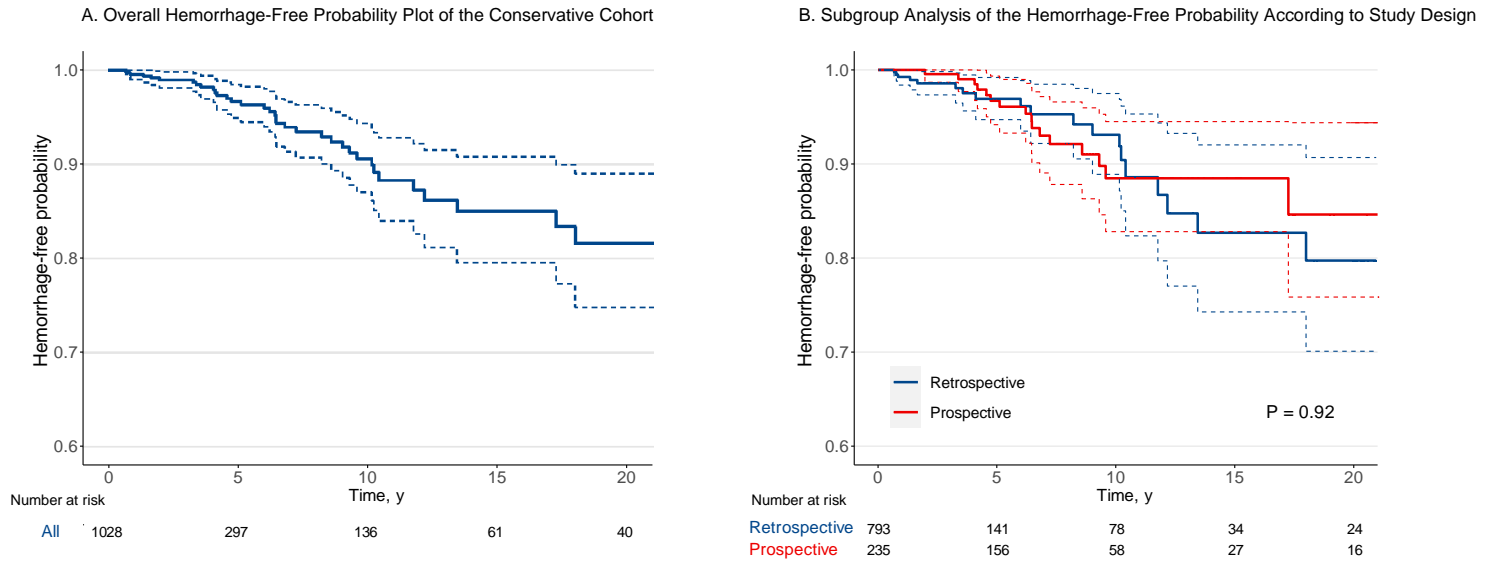

As no more hemorrhage event occurred after the 20 years' follow-up and the survival plot was then cut off there for better presentation of the data.

**eTable 3.** Literature Review of Factors Associated With Arteriovenous Malformation Rupture

| Risk Factor             | Studies                                                                                                                                                                                  |
|-------------------------|------------------------------------------------------------------------------------------------------------------------------------------------------------------------------------------|
| Hemorrhage history      | P M Crawford, 1986 <sup>1</sup> ; H Mast, 1997 <sup>2</sup> ; C Stapf, 2006 <sup>3</sup> ; H Kim, 2007 <sup>4</sup> ; J A Hernesniemi, 2008 <sup>5</sup> ; L da Costa, 2009 <sup>6</sup> |
| Deep location           | Y Itoyama, 1989 <sup>7</sup> ; S Mine, 2000 <sup>8</sup> ; M A Stefani, 2002 <sup>9</sup> ; C Stapf, 2006 <sup>3</sup> ; S Yamada, 2007 <sup>10</sup>                                    |
| Deep drainage           | H Mast, 1997 <sup>2</sup> ; C Stapf, 2006 <sup>3</sup> ; L da Costa, 2009 <sup>6</sup>                                                                                                   |
| Large nidus size        | S Mine, 2000 <sup>8</sup> ; M A Stefani, 2002 <sup>9</sup> ; J A Hernesniemi, 2008 <sup>5</sup>                                                                                          |
| Small nidus size        | C J Graf, 1983 <sup>11</sup> ; Y Itoyama, 1989 <sup>7</sup> ; R F Spetzler, 1992 <sup>12</sup>                                                                                           |
| Infratentorial location | S Mine, 2000 <sup>8</sup> ; J A Hernesniemi, 2008 <sup>5</sup>                                                                                                                           |
| Increasing age          | P M Crawford, 1986 <sup>1</sup> ; C Stapf, 2006 <sup>3</sup> ; H Kim, 2014 <sup>13</sup>                                                                                                 |
| Aneurysm                | L da Costa, 2009 <sup>6</sup>                                                                                                                                                            |
| Posterior fossa         | D Fults, 1984 <sup>14</sup>                                                                                                                                                              |
| Female                  | S Yamada, 2007 <sup>10</sup>                                                                                                                                                             |
| Male                    | H Mast, 1997 <sup>2</sup>                                                                                                                                                                |



**eTable 4.** Variable Selection and Bootstrap-Derived Quantities Useful for Assessing Stability

| Predictors                        | Global model <sup>a</sup> |        | Bootstrap inclusion frequency <sup>b</sup> (%) | Selected model <sup>c</sup> |        | RMSD ratio <sup>d</sup> | Bootstrap median <sup>e</sup> | Bootstrap 2.5 <sup>th</sup> percentile | Bootstrap 97.5 <sup>th</sup> percentile | Variance inflation factor <sup>f</sup> |
|-----------------------------------|---------------------------|--------|------------------------------------------------|-----------------------------|--------|-------------------------|-------------------------------|----------------------------------------|-----------------------------------------|----------------------------------------|
|                                   | Estimate                  | SE     |                                                | Estimate                    | SE     |                         |                               |                                        |                                         |                                        |
| Deep location (fixed)             | -0.3584                   | 0.1244 | 100                                            | 0.1389                      | 0.1158 | 7.1225                  | 0.1196                        | -0.1377                                | 0.3806                                  | 1.2366                                 |
| Exclusively deep drainage (fixed) | 1.5335                    | 0.1327 | 100                                            | 0.7088                      | 0.1266 | 7.8840                  | 0.7482                        | 0.4770                                 | 1.0083                                  | 1.2591                                 |
| Venous aneurysm                   | -1.5968                   | 0.1190 | 100                                            | -1.5697                     | 0.1189 | 16.3479                 | -1.5768                       | -1.8106                                | -1.3334                                 | 1.0384                                 |
| Ventricular system involvement    | 1.5335                    | 0.0932 | 100                                            | 1.4057                      | 0.0910 | 16.3920                 | 1.4214                        | 1.2339                                 | 1.604                                   | 1.1931                                 |
| Venous stenosis                   | 0.9139                    | 0.1198 | 100                                            | 0.9364                      | 0.1197 | 9.8174                  | 0.9428                        | 0.6968                                 | 1.2185                                  | 1.0246                                 |
| Single feeder                     | 0.8966                    | 0.1074 | 100                                            | 0.8651                      | 0.1068 | 10.4198                 | 0.8717                        | 0.6465                                 | 1.0753                                  | 1.2112                                 |
| Large nidus size                  | -0.8445                   | 0.0930 | 100                                            | -0.7351                     | 0.0924 | 13.5071                 | -0.7478                       | -0.9266                                | -0.5604                                 | 1.2133                                 |
| Diffuse nidus                     | 0.7959                    | 0.0904 | 100                                            | 0.8127                      | 0.0898 | 12.1001                 | 0.8210                        | 0.6477                                 | 1.0037                                  | 1.0049                                 |
| Aneurysm                          | 0.5154                    | 0.1151 | 99.9                                           | 0.5166                      | 0.1151 | 8.1827                  | 0.5151                        | 0.3093                                 | 0.7526                                  | 1.0231                                 |
| Multiple source feeding           | -0.3692                   | 0.1010 | 97.3                                           | -0.3452                     | 0.1002 | 9.9326                  | -0.3407                       | -0.5508                                | 0                                       | 1.2379                                 |
| Eloquent region                   | 0.1284                    | 0.0912 | 33.9                                           | 0                           | 0      | 9.5311                  | 0                             | 0                                      | 0.269                                   | -                                      |
| Perforating artery supply         | 0.1699                    | 0.1039 | 31.2                                           | 0                           | 0      | 8.5867                  | 0                             | -0.3088                                | 0                                       | -                                      |

Abbreviations: SE, standard error; RMSD, root mean squared difference.

<sup>a</sup> The global model includes all candidate variables with regression coefficients and standard errors.

<sup>b</sup> Bootstrap inclusion frequencies are used to quantify how likely a variable is selected.

<sup>c</sup> Selected model is the model selected by Akaike information criterion using backward stepwise regression, and in our study, we didn't apply all these variables to the scoring system for the applicability in clinical practice. Variables were ranked and selected by the estimate for the final development of the scoring system.

<sup>d</sup> RMSD ratio is RMSD divided by the standard error of that coefficient in the global model, intuitively expresses the variance inflation or deflation caused by variable selection.

<sup>e</sup> Bootstrap median and the 95% CI are the coefficients estimated in the bootstrap procedure.

<sup>f</sup> The variance inflation factor was calculated to assess the multicollinearity of the finally significant 10 variables. The results showed no significant collinearity was observed across these variables.

**eFigure 2.** Hemorrhage Probability in the Derivation Cohort

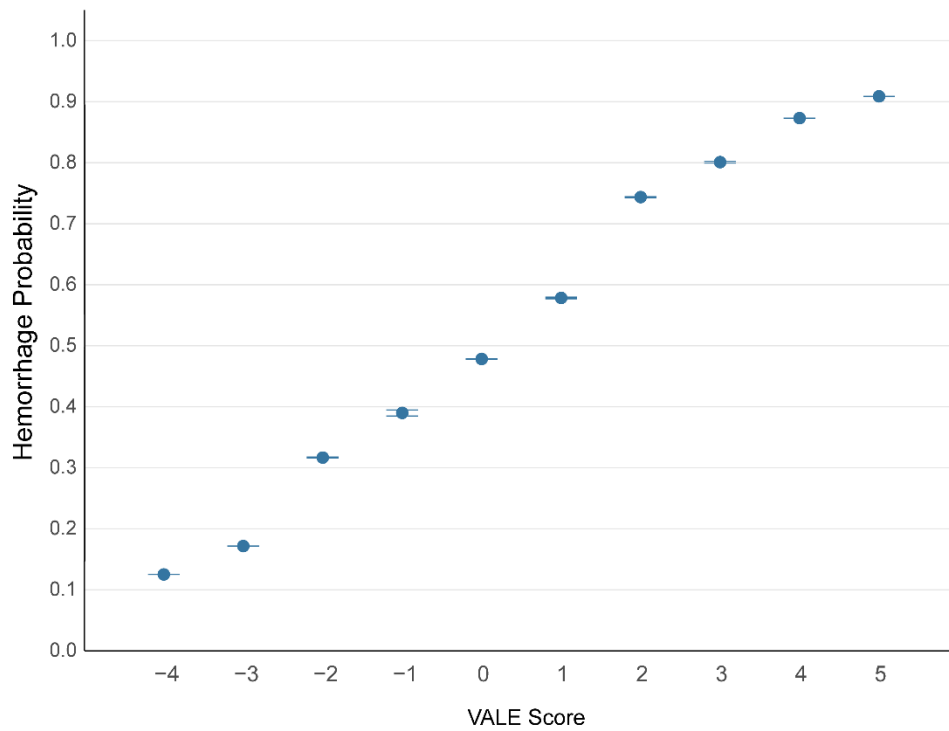

The probability of presentation with hemorrhage as predicted by the VALE Score for the derivation cohort. Supplement eMethods 2 showed how the probabilities were calculated.

**eTable 5.** Subgroup Analysis of VALE Score in the Conservative Treatment Validation Cohort According to the Retrospective and Prospective Nature of the Survival Data

|                      | Sample size | AUC                    | Specificity            | Sensitivity            | Accuracy               | NPV                    |
|----------------------|-------------|------------------------|------------------------|------------------------|------------------------|------------------------|
| Complete cohort      | 1028        | 0.729<br>(0.645-0.813) | 0.792<br>(0.769-0.819) | 0.556<br>(0.389-0.722) | 0.785<br>(0.761-0.809) | 0.980<br>(0.973-0.987) |
| Prospective cohort   | 235         | 0.725<br>(0.599-0.851) | 0.784<br>(0.729-0.839) | 0.529<br>(0.294-0.765) | 0.766<br>(0.715-0.817) | 0.955<br>(0.934-0.977) |
| Retrospective cohort | 793         | 0.734<br>(0.618-0.850) | 0.795<br>(0.766-0.822) | 0.579<br>(0.368-0.790) | 0.789<br>(0.762-0.817) | 0.987<br>(0.981-0.994) |

Abbreviations: AUC, area under the curve; NPV, negative predictive value.

**eFigure 3.** Illustration Cases for the VALE Score

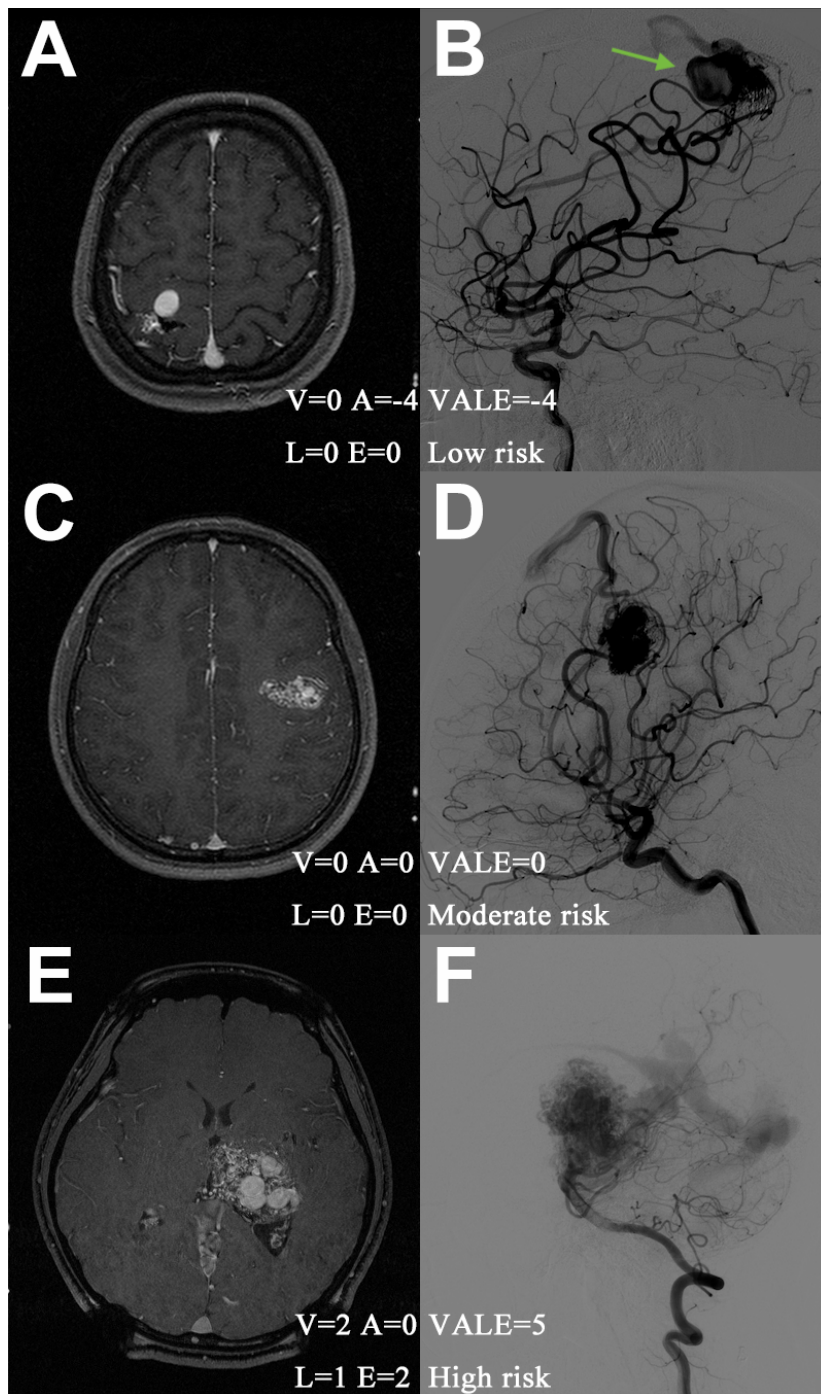

A-B, One unruptured AVM patient presenting with epilepsy was assessed as low-risk group by VALE score (Ventricular system involvement=0, venous Aneurysm=-4, deep Location=0, Exclusive deep drainage=0, VALE=-4), and had no subsequent hemorrhage within 8.75 years of follow-up after diagnosis (venous aneurysm: green arrow); C-D, One unruptured AVM patient presenting with dull headache was assessed as moderate-risk group (Ventricular system involvement=0, venous Aneurysm=0, deep Location=0, Exclusive deep drainage=0, VALE=0) by VALE score, and had no subsequent hemorrhage during 6.25 years of follow-up after diagnosis; E-F, A patient with unruptured AVM presenting with right limb weakness was assessed as a high-risk group by VALE score (Ventricular system involvement=2, venous Aneurysm=0, deep Location=1, Exclusive deep drainage=2, VALE=5), who had first hemorrhage 8.17 years after diagnosis and repeated rupture 3 times in the following 5 years.

**eTable 6.** Univariable Analysis of Angiographic Features in Different Cohorts

| Parameter                                          | Derivation Cohort |          | External Validation Cohort |          | Conservative Cohort |          |
|----------------------------------------------------|-------------------|----------|----------------------------|----------|---------------------|----------|
|                                                    | OR (95% CI)       | <i>P</i> | OR (95% CI)                | <i>P</i> | HR (95% CI)         | <i>P</i> |
| <b>Ventricular system involvement</b> <sup>a</sup> | 4.11 (3.57-4.74)  | <0.01    | 8.82 (5.43-14.34)          | <0.01    | 4.04 (2.02-8.08)    | <0.01    |
| <b>Deep location</b> <sup>a</sup>                  | 2.77 (2.33-3.30)  | <0.01    | 2.63 (1.65-4.18)           | <0.01    | 4.39 (2.22-8.70)    | <0.01    |
| Large nidus size                                   | 0.32 (0.28-0.37)  | <0.01    | 0.67 (0.44-1.01)           | 0.06     | 1.06 (0.50-2.25)    | 0.89     |
| Eloquent region                                    | 1.33 (1.16-1.52)  | <0.01    | 1.32 (0.85-2.01)           | 0.21     | 4.01 (1.67-9.63)    | <0.01    |
| Single feeder                                      | 3.56 (3.01-4.20)  | <0.01    | 1.72 (0.93-2.72)           | 0.02     | 0.69 (0.21-2.26)    | 0.54     |
| Multiple source feeding                            | 0.45 (0.39-0.53)  | <0.01    | 0.73 (0.46-1.17)           | 0.19     | 1.71 (0.88-3.33)    | 0.11     |
| <b>Perforating artery supply</b> <sup>a</sup>      | 1.72 (1.49-1.98)  | <0.01    | 2.04 (1.32-3.13)           | <0.01    | 3.09 (1.56-6.13)    | <0.01    |
| Aneurysm                                           | 1.37 (1.14-1.65)  | <0.01    | 1.77 (1.04-3.00)           | 0.04     | 1.69 (0.83-3.45)    | 0.15     |
| Diffuse nidus                                      | 2.80 (2.41-3.26)  | <0.01    | 3.99 (2.41-6.60)           | <0.01    | 0.92 (0.44-1.91)    | 0.82     |
| Any deep drainage                                  | 2.02 (1.75-2.33)  | <0.01    | 2.12 (1.39-3.24)           | <0.01    | 2.33 (1.20-4.53)    | 0.01     |
| <b>Exclusively deep drainage</b> <sup>a</sup>      | 4.51 (3.70-5.50)  | <0.01    | 6.32 (3.48-11.46)          | <0.01    | 3.60 (1.63-7.96)    | <0.01    |
| Venous stenosis                                    | 1.90 (1.56-2.32)  | <0.01    | 5.45 (2.90-10.26)          | <0.01    | 0.93 (0.28-3.04)    | 0.91     |
| Venous aneurysm                                    | 0.15 (0.13-0.19)  | <0.01    | 0.09 (0.05-0.15)           | <0.01    | 0.42 (0.17-1.00)    | 0.05     |

Abbreviations: OR, odds ratio; HR, hazard ratio.

<sup>a</sup> Variables remains significant across three cohorts

## References

1. Crawford PM, West CR, Chadwick DW, Shaw MD. Arteriovenous malformations of the brain: natural history in unoperated patients. *J Neurol Neurosurg Psychiatry*. 1986;49(1):1-10. doi:10.1136/jnnp.49.1.1
2. Mast H, Young WL, Koennecke HC, et al. Risk of spontaneous haemorrhage after diagnosis of cerebral arteriovenous malformation. *Lancet*. 1997;350(9084):1065-1068. doi:10.1016/s0140-6736(97)05390-7
3. Stapf C, Mast H, Sciacca RR, et al. Predictors of hemorrhage in patients with untreated brain arteriovenous malformation. *Neurology*. 2006;66(9):1350-1355. doi:10.1212/01.wnl.0000210524.68507.87
4. Kim H, Sidney S, McCulloch CE, et al. Racial/Ethnic differences in longitudinal risk of intracranial hemorrhage in brain arteriovenous malformation patients. *Stroke*. 2007;38(9):2430-2437. doi:10.1161/STROKEAHA.107.485573
5. Hernesniemi JA, Dashti R, Juvela S, Väärt K, Niemelä M, Laakso A. Natural history of brain arteriovenous malformations: a long-term follow-up study of risk of hemorrhage in 238 patients. *Neurosurgery*. 2008;63(5):823-829; discussion 829-831. doi:10.1227/01.NEU.0000330401.82582.5E
6. da Costa L, Wallace MC, Ter Brugge KG, O'Kelly C, Willinsky RA, Tymianski M. The natural history and predictive features of hemorrhage from brain arteriovenous malformations. *Stroke*. 2009;40(1):100-105. doi:10.1161/STROKEAHA.108.524678
7. Itoyama Y, Uemura S, Ushio Y, et al. Natural course of unoperated intracranial arteriovenous malformations: study of 50 cases. *J Neurosurg*. 1989;71(6):805-809. doi:10.3171/jns.1989.71.6.0805
8. Mine S, Hirai S, Ono J, Yamaura A. Risk factors for poor outcome of untreated arteriovenous malformation. *J Clin Neurosci*. 2000;7(6):503-506. doi:10.1054/jocn.2000.0743
9. Stefani MA, Porter PJ, terBrugge KG, Montanera W, Willinsky RA, Wallace MC. Large and deep brain arteriovenous malformations are associated with risk of future hemorrhage. *Stroke*. 2002;33(5):1220-1224. doi:10.1161/01.str.0000013738.53113.33
10. Yamada S, Takagi Y, Nozaki K, Kikuta K ichiro, Hashimoto N. Risk factors for subsequent hemorrhage in patients with cerebral arteriovenous malformations. *J Neurosurg*. 2007;107(5):965-972. doi:10.3171/JNS-07/11/0965
11. Graf CJ, Perret GE, Torner JC. Bleeding from cerebral arteriovenous malformations as part of their natural history. *J Neurosurg*. 1983;58(3):331-337. doi:10.3171/jns.1983.58.3.0331
12. Spetzler RF, Hargraves RW, McCormick PW, Zabramski JM, Flom RA, Zimmerman RS. Relationship of perfusion pressure and size to risk of hemorrhage from arteriovenous malformations. *J Neurosurg*. 1992;76(6):918-923. doi:10.3171/jns.1992.76.6.0918
13. Kim H, Al-Shahi Salman R, McCulloch CE, Stapf C, Young WL, MARS Coinvestigators. Untreated brain arteriovenous malformation: patient-level meta-analysis of hemorrhage predictors. *Neurology*. 2014;83(7):590-597. doi:10.1212/WNL.0000000000000688
14. Fults D, Kelly DL. Natural history of arteriovenous malformations of the brain: a clinical study. *Neurosurgery*. 1984;15(5):658-662. doi:10.1227/00006123-198411000-00003
