# Supplementary material for: Development and Validation of a Scoring System for Hemorrhage Risk in Brain Arteriovenous Malformations
Source: PubMed Central journal article supplement (PMC9978947; doi:10.1001/jamanetworkopen.2023.1070), 2023-03-01
Supplement: jamanetwopen-e231070-s002.pdf [file jamanetwopen-e231070-s002.pdf]

## Data Sharing Statement

Chen. Development and Validation of a Scoring System for Hemorrhage Risk in Brain Arteriovenous Malformations. *JAMA Netw Open*. Published March 01, 2023.  
doi:10.1001/jamanetworkopen.2023.1070

### Data

**Data available:** No

### Additional Information

**Explanation for why data not available:** All original data are available upon reasonable request to the corresponding authors.
